# Supplementary material for: Periodic large mesoporous organosilicas from lyotropic liquid crystal polymer templatesElectronic supplementary information (ESI) available: TEM image, MAS NMR and FT-IR spectra, and BJH pore size distribution for PMO materials. See http://www.rsc.org/suppdata/cc/b1/b106938c/
Source: Royal Society of Chemistry journal article supplement (doi:10.1039/b106938c), 2001-11-13

**Fig. III** FT-IR spectra, (a) as-synthesised organosilica-surfactant mesophase after hydrothermal treatment; (b) as (a) after extraction.


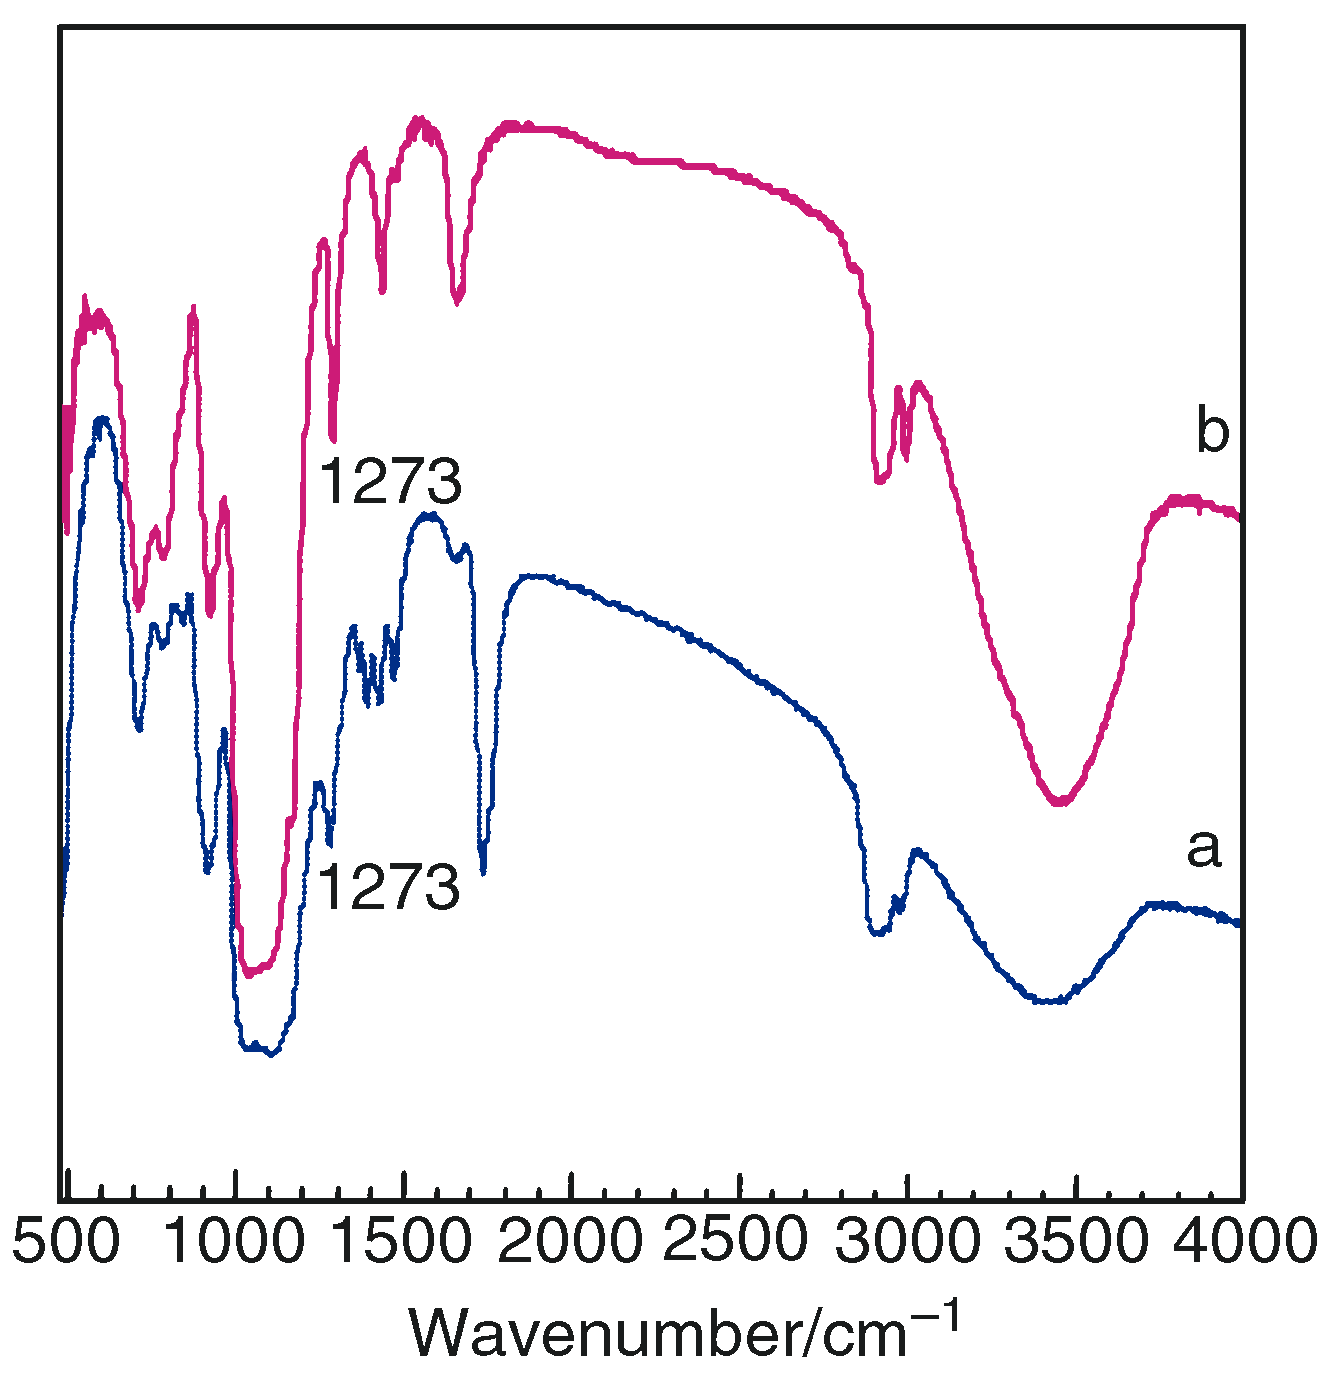

Supplement: b106938c(3).doc [file b106938c%283%29.doc]
